# Supplementary material
Source: PubMed Central journal article supplement (PMC7689951)
Supplement: ao0c04795_si_001.pdf [file ao0c04795_si_001.pdf]

# Supporting Information

## **Quercetin covalently-linked lipid nanoparticles: Multi-faceted killing effect on tumor cells**

*Shao-qing Chen<sup>a</sup>, Cheng Wang<sup>a</sup>, Yan-qing Song<sup>a</sup>, Shan Tao<sup>a</sup>, Fang-ying Yu<sup>a</sup>, Hai-ya Lou<sup>b</sup>, Fu-qiang Hu<sup>a</sup>, Hong Yuan<sup>a\*</sup>*

<sup>a</sup> College of Pharmaceutical Sciences, Zhejiang University, Yuhangtang Road 866, Hangzhou 310058, China.

<sup>b</sup> Sir Run Run Shaw Hospital, School of Medicine, Zhejiang University, No. 3 Qingchun East Road, Hangzhou, 310016, China.

Corresponding author's E-mail: [yuanhong70@zju.edu.cn](mailto:yuanhong70@zju.edu.cn) for Hong Yuan\*.

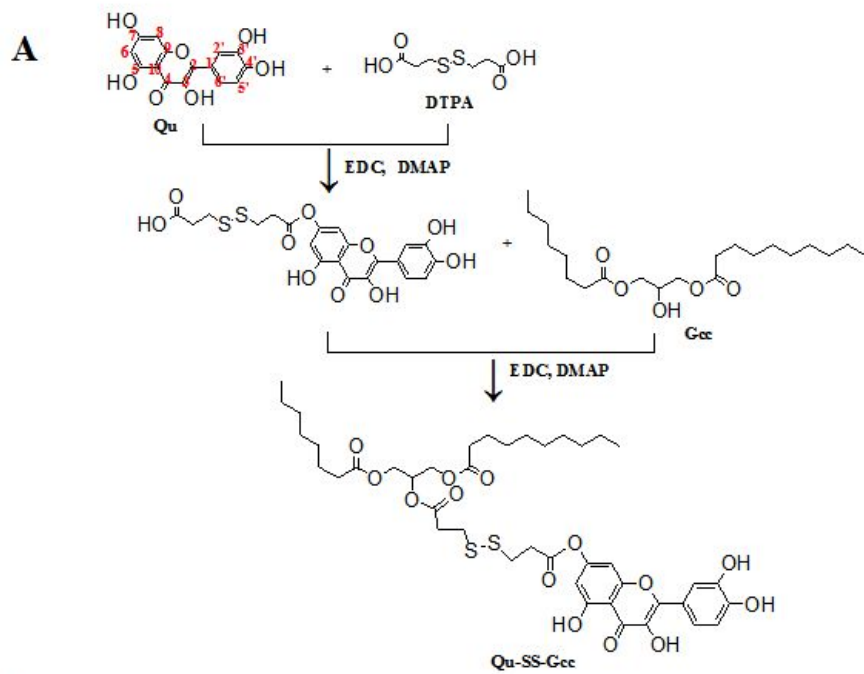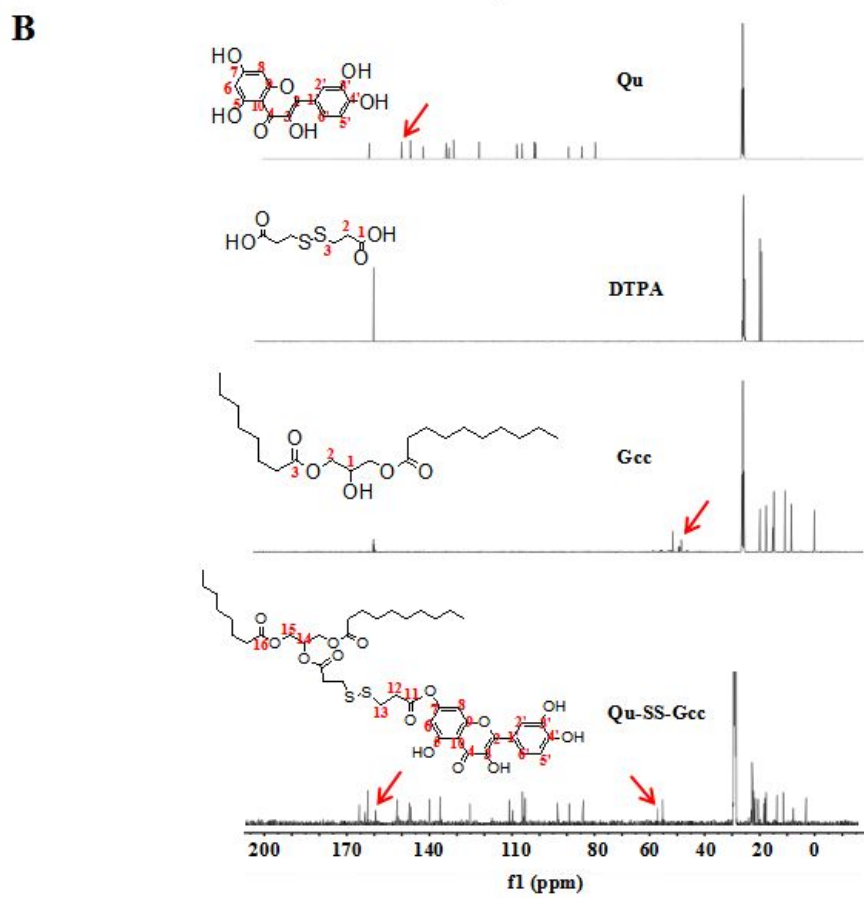

**Figure S1.** Synthetic route to Qu-SS-Gcc and structural characterization. (A) Synthetic route to Qu-SS-Gcc. (B)  $^{13}\text{C}$  NMR spectra of Qu, DTPA, Gcc and Qu-SS-Gcc. All the chemicals were dissolved in methanol.

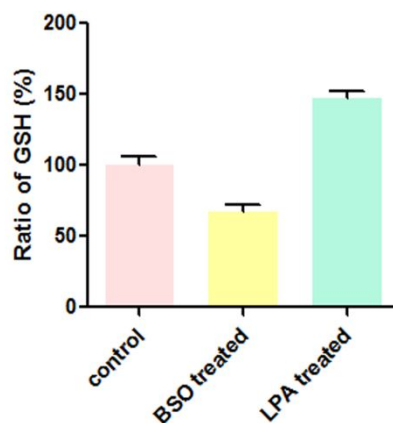

**Figure S2.** Change of glutathione content in MCF-7/ADR cells after treated with BSO or LPA.

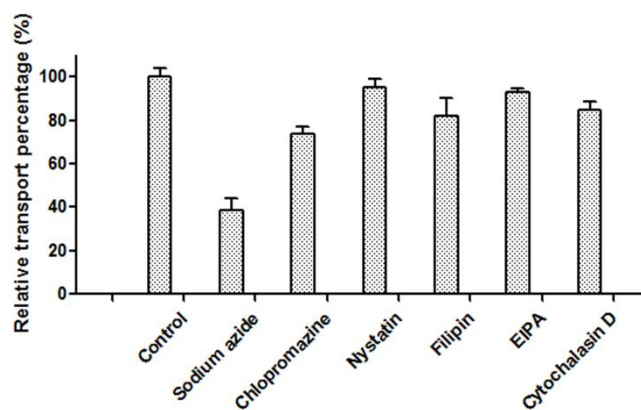

**Figure S3.** Effects of different inhibitors on the transport of Qu-SS-Gcc LNPs across MDCK cell monolayer.

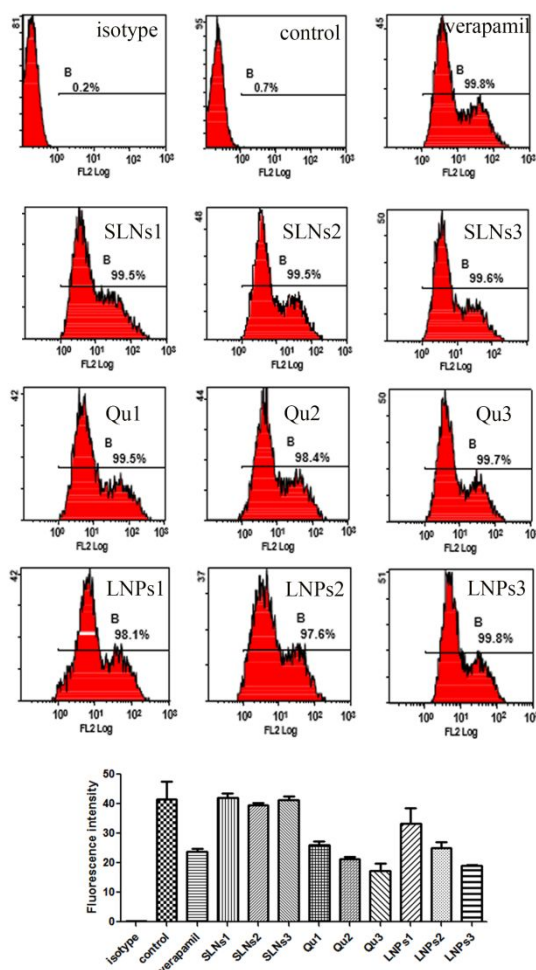

**Figure S4.** Flow cytometry of P-gp in MCF-7/ADR cells treated with indicated concentrations of Qu or Qu-SS-Gcc LNPs for 24 h. SLNs1, 2, 3 represent 20, 50, and 100  $\mu$ M MS SLNs respectively; Qu1, 2, 3 represent 20, 50, and 100  $\mu$ M Qu respectively; LNPs1, 2, 3 represent 20, 50, and 100  $\mu$ M Qu-SS-Gcc LNPs respectively.

**Table S1** Inhibitors used in this study and their functions as well as concentrations

| Inhibitors     | Function                                                     | Final concentration |
|----------------|--------------------------------------------------------------|---------------------|
| sodium azide   | Energy-Dependent Inhibitor<br>active transport inhibitor     | 1 mg/mL             |
| nystatin       | Endocytosis Inhibitors<br>lipid raft/caveolae-mediated route | 30 $\mu$ M          |
| filipin        | lipid raft/caveolae-mediated pathway                         | 5 $\mu$ g/mL        |
| chlorpromazine | inhibitor of clathrin-mediated pathway                       | 30 $\mu$ M          |
| EIPA           | inhibitor of macropinocytosis pathway                        | 100 $\mu$ M         |
| cytochalasin D | disrupt actin filaments                                      | 5 $\mu$ M           |
